# Supplementary material for: The selectivity of galardin and an azasugar-based hydroxamate compound for human matrix metalloproteases and bacterial metalloproteases
Source: PLOS journal article supplement (doi:10.1371/journal.pone.0200237), 2018-08-03
Supplement: S1 (10.1371/journal.pone.0200237.s001) [file journal.pone.0200237.s001]

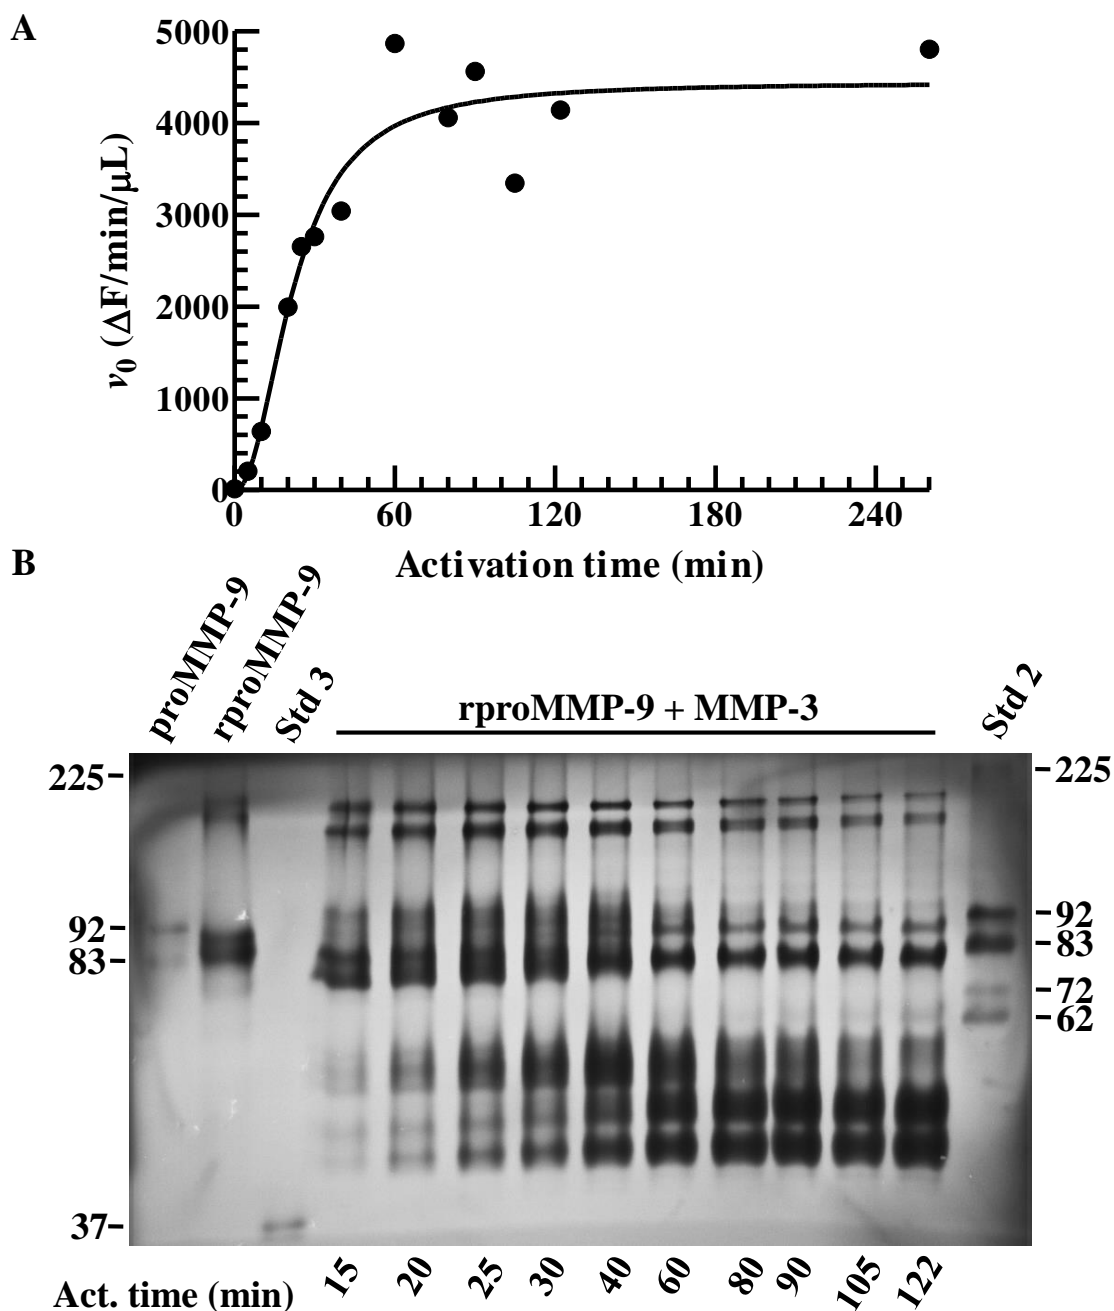

**S1 Fig. Activation of full length recombinant human proMMP-9 with MMP-3(catalytic domain).** (A) Twenty  $\mu\text{L}$  of 4.6  $\mu\text{M}$  proMMP-9 was mixed with 20  $\mu\text{L}$  of 0.05  $\mu\text{M}$  MMP-3 at 37  $^{\circ}\text{C}$ . At different time points either 0.5  $\mu\text{L}$  (up to 30 min) or 0.25  $\mu\text{L}$  (from 40 min) of activation mixture was added to 99  $\mu\text{L}$  of 10  $\mu\text{M}$  substrate (in assay buffer) and the enzyme activity (initial rate) was determined as described in methods. (B) At the same time points as in (A), 0.5  $\mu\text{L}$  of activation mixture was mixed with 19.5  $\mu\text{L}$  of 10 mM EDTA (in assay buffer). This mixture was further diluted (12.5 times) and mixed with sample buffer and applied to real-time gelatin zymography as described in methods. The molecular size standards used were proMMP-9 purified from THP-1 cells (proMMP-9), recombinant human full length proMMP-9 purified (rproMMP-9) from sf9 cells, the 37 kDa catalytic domain of MMP-9 (Std 3) and a mixture of proMMP-9 from THP-1 cells and proMMP-2 from human skin fibroblasts (Std 2).
